# Supplementary material
Source: PubMed Central journal article supplement (PMC4548735)
Supplement: BMI-10-2015-075-s001.pdf [file BMI-10-2015-075-s001.pdf]

## SUPPLEMENTARY INFORMATION

### Supplementary Tables

Supplementary Table 1: Data collection from healthy individuals

| No. | Age | Sex | Blood group | VWF:Ag (IU/dL) | VWFpp (U/dL) | VWFpp/VWF:Ag ratio |
|-----|-----|-----|-------------|----------------|--------------|--------------------|
| 1   | 54  | M   | O+          | 156            | 97           | 0.6                |
| 2   | 20  | F   | B-          | 180            | 75           | 0.4                |
| 3   | 49  | M   | A+          | 162            | 72           | 0.4                |
| 4   | 27  | M   | A+          | 129            | 100          | 0.8                |
| 5   | 33  | M   | AB+         | 165            | 82           | 0.5                |
| 6   | 24  | F   | B+          | 96             | 82           | 0.8                |
| 7   | 25  | F   | A+          | 127            | 95           | 0.8                |
| 8   | 21  | F   | O+          | 121            | 110          | 0.9                |
| 9   | 19  | F   | O+          | 90             | 75           | 0.8                |
| 10  | 22  | F   | B+          | 169            | 91           | 0.5                |
| 11  | 22  | F   | O+          | 81             | 44           | 0.5                |
| 12  | 33  | M   | O+          | 56             | 51           | 0.9                |
| 13  | 22  | F   | A+          | 179            | 132          | 0.7                |
| 14  | 21  | F   | A+          | 144            | 73           | 0.5                |
| 15  | 20  | F   | O+          | 85             | 76           | 0.9                |
| 16  | 50  | F   | B+          | 148            | 83           | 0.6                |
| 17  | 36  | M   | B+          | 134            | 77           | 0.6                |
| 18  | 33  | M   | O+          | 76             | 60           | 0.8                |
| 19  | 22  | F   | O+          | 89             | 75           | 0.8                |
| 20  | 22  | M   | B+          | 69             | 58           | 0.8                |
| 21  | 42  | M   | O+          | 150            | 96           | 0.6                |
| 22  | 45  | M   | O+          | 95             | 84           | 0.9                |
| 23  | 23  | M   | B+          | 123            | 78           | 0.6                |
| 24  | 22  | M   | B+          | 212            | 102          | 0.5                |
| 25  | 22  | F   | O+          | 110            | 88           | 0.8                |
| 26  | 34  | M   | A+          | 185            | 125          | 0.7                |
| 27  | 19  | M   | B+          | 97             | 101          | 1.0                |
| 28  | 19  | F   | O+          | 96             | 64           | 0.7                |
| 29  | 23  | F   | B+          | 181            | 103          | 0.6                |
| 30  | 42  | F   | O+          | 132            | 90           | 0.7                |

Supplementary Table 2: Data collection from patients with cardiovascular disease

| No. | Blood collection date | Diagnosis                   | Age | Sex | Blood group | VWF:Ag (IU/dL) | VWFpp (U/dL) | VWFpp/VWF:Ag ratio |
|-----|-----------------------|-----------------------------|-----|-----|-------------|----------------|--------------|--------------------|
| 1   | 19/9/13               | Acute myocardial infarction | 51  | M   | O+          | 263            | 266          | 1.0                |
| 2   | 19/9/13               | Unstable angina             | 40  | M   | AB+         | 254            | 138          | 0.5                |
| 3   | 20/9/13               | Cardiogenic shock           | 51  | M   | O+          | 249            | 295          | 1.2                |
| 4   | 20/9/13               | Congestive heart failure    | 62  | M   | O+          | 314            | 187          | 0.6                |
| 5   | 21/9/13               | Ischemic heart disease      | 48  | M   | B+          | 240            | 235          | 1.0                |
| 6   | 21/9/13               | Acute coronary syndrome     | 69  | M   | AB+         | 252            | 249          | 1.0                |
| 7   | 22/9/13               | Stable angina               | 64  | F   | O+          | 257            | 112          | 0.4                |
| 8   | 8/10/13               | Pulmonary embolism          | 26  | F   | A+          | 180            | 100          | 0.6                |
| 9   | 29/10/13              | Venous thrombosis           | 15  | M   | O+          | 283            | 95           | 0.3                |
| 10  | 29/10/13              | Acute myocardial infarction | 58  | M   | A+          | 346            | 307          | 0.9                |
| 11  | 30/10/13              | Acute coronary syndrome     | 64  | F   | B+          | 231            | 227          | 1.0                |
| 12  | 30/10/13              | Ischemic heart disease      | 59  | M   | O+          | 228            | 233          | 1.0                |
| 13  | 30/10/13              | Pulmonary embolism          | 28  | F   | O+          | 259            | 115          | 0.4                |
| 14  | 31/10/13              | Myocardial infarction       | 65  | M   | B+          | 335            | 282          | 0.8                |
| 15  | 2/11/13               | Myocardial infarction       | 65  | M   | B+          | 235            | 141          | 0.6                |
| 16  | 3/11/13               | Acute myocardial infarction | 65  | M   | B+          | 355            | 250          | 0.7                |
| 17  | 3/11/13               | Acute myocardial infarction | 68  | F   | A+          | 231            | 113          | 0.5                |
| 18  | 4/11/13               | Congestive heart failure    | 48  | F   | B+          | 245            | 307          | 1.3                |
| 19  | 29/12/13              | Acute myocardial infarction | 36  | M   | B+          | 205            | 139          | 0.7                |
| 20  | 1/1/14                | Acute coronary syndrome     | 44  | F   | B+          | 180            | 217          | 1.2                |
| 21  | 5/2/14                | Ischemic heart disease      | 68  | M   | B+          | 207            | 164          | 0.8                |

Supplementary Table 3: Data collection from patients with other diseases

| No. | Blood collection date | Diagnosis                           | Age | Sex | Blood group | VWF:Ag (IU/dL) | VWFpp (U/dL) | VWFpp/VWF:Ag ratio |
|-----|-----------------------|-------------------------------------|-----|-----|-------------|----------------|--------------|--------------------|
| 1   | 19/9/13               | Acute myeloid leukaemia             | 26  | M   | A+          | 156            | 107          | 0.7                |
| 2   | 19/9/13               | Gastrointestinal bleeding (ulcer)   | 56  | F   | B+          | 229            | 407          | 1.8                |
| 3   | 20/9/13               | Acute pulmonary oedema/infection    | 68  | F   | A+          | 243            | 234          | 1.0                |
| 4   | 20/9/13               | Sepsis                              | 38  | F   | B+          | 405            | 317          | 0.8                |
| 5   | 20/9/13               | Chronic pancreatitis                | 44  | M   | A+          | 191            | 156          | 0.8                |
| 6   | 22/9/13               | Multiple myeloma                    | 67  | F   | B+          | 340            | 369          | 1.1                |
| 7   | 22/9/13               | Chronic myeloid leukaemia           | 30  | F   | AB+         | 441            | 626          | 1.4                |
| 8   | 22/9/13               | Acute respiratory distress syndrome | 28  | F   | A+          | 387            | 429          | 1.1                |
| 9   | 23/9/13               | Cervical cancer                     | 56  | F   | B+          | 194            | 239          | 1.2                |
| 10  | 29/10/13              | Liver cirrhosis                     | 59  | M   | AB+         | 231            | 342          | 1.5                |
| 11  | 4/11/13               | Chronic liver disease               | 59  | M   | AB+         | 394            | 474          | 1.2                |
| 12  | 24/12/13              | Intestinal obstruction              | 66  | M   | A+          | 223            | 192          | 0.9                |
| 13  | 25/12/13              | Subdural haemorrhage                | 45  | F   | B+          | 144            | 175          | 1.2                |
| 14  | 25/12/13              | Intracranial bleeding               | 67  | M   | A+          | 343            | 440          | 1.3                |
| 15  | 25/12/13              | Pancreatic cancer                   | 47  | M   | A+          | 191            | 111          | 0.6                |
| 16  | 28/12/13              | Hodgkin lymphoma                    | 29  | F   | O+          | 239            | 152          | 0.6                |
| 17  | 28/12/13              | Left foot gangrene                  | 58  | F   | O+          | 546            | 328          | 0.6                |
| 18  | 30/12/13              | Haemophilia                         | 32  | M   | B+          | 181            | 130          | 0.7                |
| 19  | 1/1/14                | Tuberculosis                        | 39  | M   | O+          | 192            | 253          | 1.3                |
| 20  | 1/1/14                | Melioidosis                         | 57  | F   | O+          | 293            | 182          | 0.6                |
| 21  | 4/2/14                | Cholelithiasis                      | 59  | M   | A+          | 128            | 109          | 0.8                |
